# Supplementary material for: Genome-wide DNA methylation profiling using the methylation-dependent restriction enzyme LpnPI
Source: PubMed Central journal article supplement — Genome Res. 2018 Jan;28(1):88–99. doi: 10.1101/gr.222885.117 (PMC5749185; doi:10.1101/gr.222885.117), 2018-01
Supplement: supp_gr.222885.117_Supplemental_Fig_S1.pdf [file supp_gr.222885.117_Supplemental_Fig_S1.pdf]

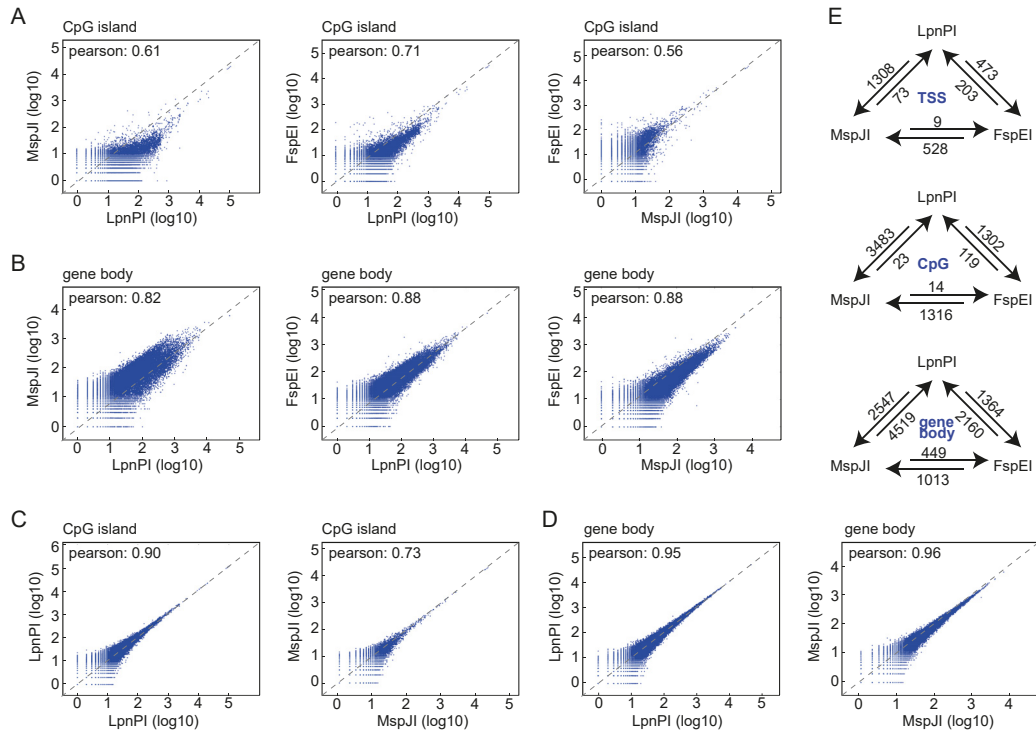

Supplemental Fig S1. MeD-seq gene body and CpG island correlation analysis.

- Pearson correlation analysis of MeD-seq read counts of CpG islands for LpnPI-MspJI (left), LpnPI-FspEI (middle) and MspJI-FspEI (right) comparisons.
- Pearson correlation analysis of MeD-seq read counts of gene bodies for LpnPI-MspJI (left), LpnPI-FspEI (middle) and MspJI-FspEI (right) comparisons.
- Pearson correlation analysis of MeD-seq read counts of CpG islands for technical replicates digested with LpnPI (left) and MspJI (right).
- As in (c) but now for gene bodies.
- Significant DMRs found between LpnPI-MspJI, LpnPI-FspEI and MspJI-FspEI comparisons. The number of hypermethylated DMRs in each comparison is shown.
