# Supplementary material for: Genome-wide DNA methylation profiling using the methylation-dependent restriction enzyme LpnPI
Source: PubMed Central journal article supplement — Genome Res. 2018 Jan;28(1):88–99. doi: 10.1101/gr.222885.117 (PMC5749185; doi:10.1101/gr.222885.117), 2018-01
Supplement: supp_gr.222885.117_Supplemental_Fig_S2.pdf [file supp_gr.222885.117_Supplemental_Fig_S2.pdf]

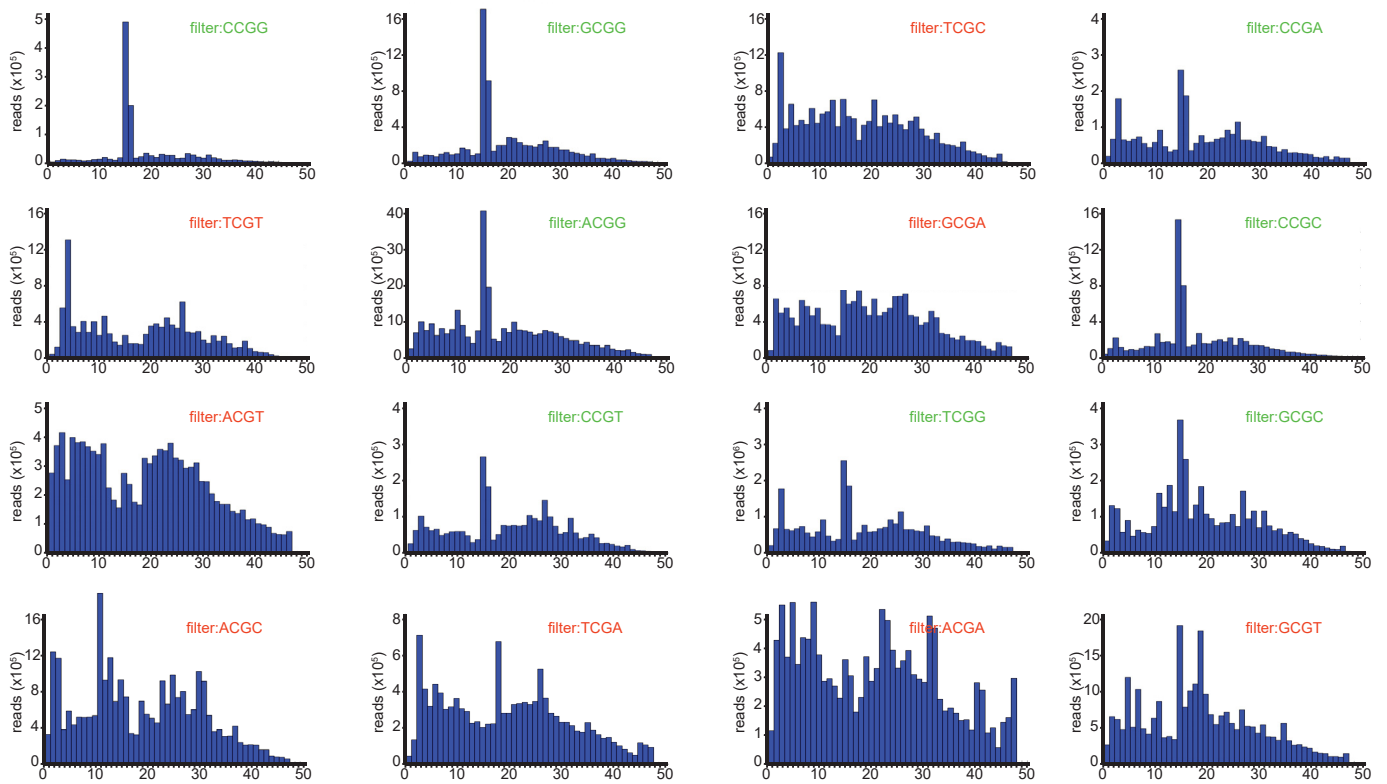

Supplemental Fig S2. Determining the LpnPI recognition sequence.

Histograms showing the position of indicated tetranucleotide sequences in the sequencing reads obtained using fibroblast DNA. Tetra nucleotide sequences indicated in green were included in the LpnPI filter.
