# Supplementary material for: Genome-wide DNA methylation profiling using the methylation-dependent restriction enzyme LpnPI
Source: PubMed Central journal article supplement — Genome Res. 2018 Jan;28(1):88–99. doi: 10.1101/gr.222885.117 (PMC5749185; doi:10.1101/gr.222885.117), 2018-01
Supplement: supp_gr.222885.117_Supplemental_Fig_S5.pdf [file supp_gr.222885.117_Supplemental_Fig_S5.pdf]

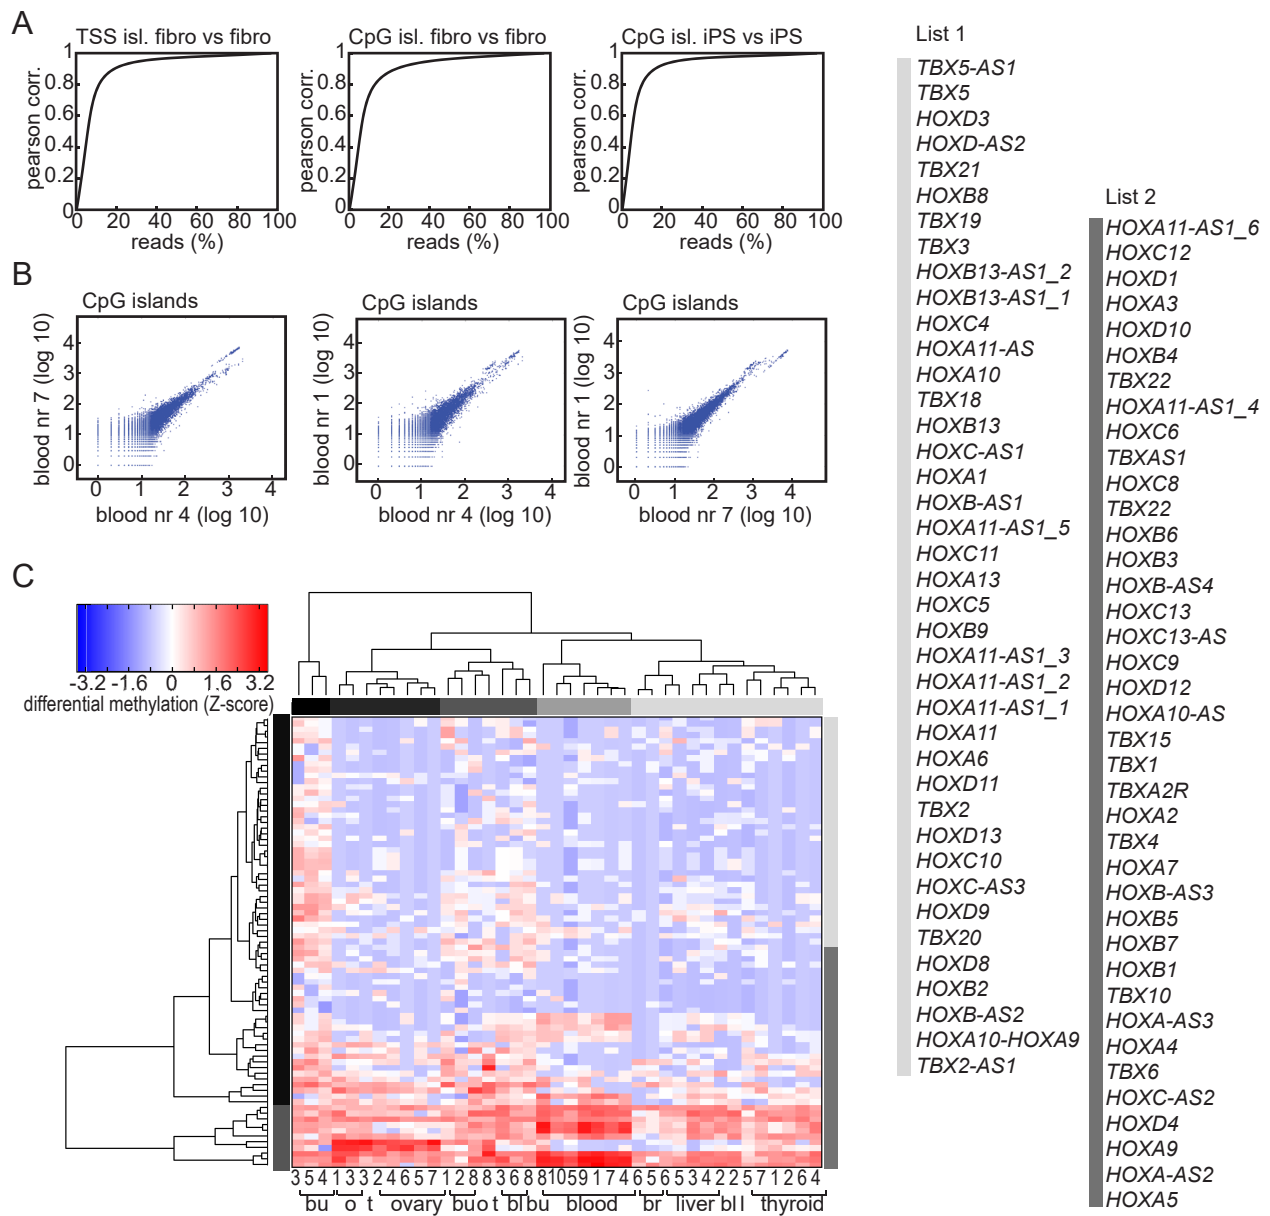

Supplemental Fig S5. Tissue and patient specific DMRs.

- a) Pearson correlation analysis of CpG islands and TSSs upon in silico dilution starting with 150 million reads.
- b) Correlation analysis of CpG island read counts between blood samples of different patients.
- c) Unsupervised hierarchical clustering of tissues based on differentially methylated TSS in the *HOXA-D* and *TBX* gene loci called by Chi-squared testing and Bonferroni correction, color grades are based on the Z-scores of the read count.
