# Supplementary material for: Genome-wide DNA methylation profiling using the methylation-dependent restriction enzyme LpnPI
Source: PubMed Central journal article supplement — Genome Res. 2018 Jan;28(1):88–99. doi: 10.1101/gr.222885.117 (PMC5749185; doi:10.1101/gr.222885.117), 2018-01
Supplement: supp_gr.222885.117_Supplemental_Fig_S7.pdf [file supp_gr.222885.117_Supplemental_Fig_S7.pdf]

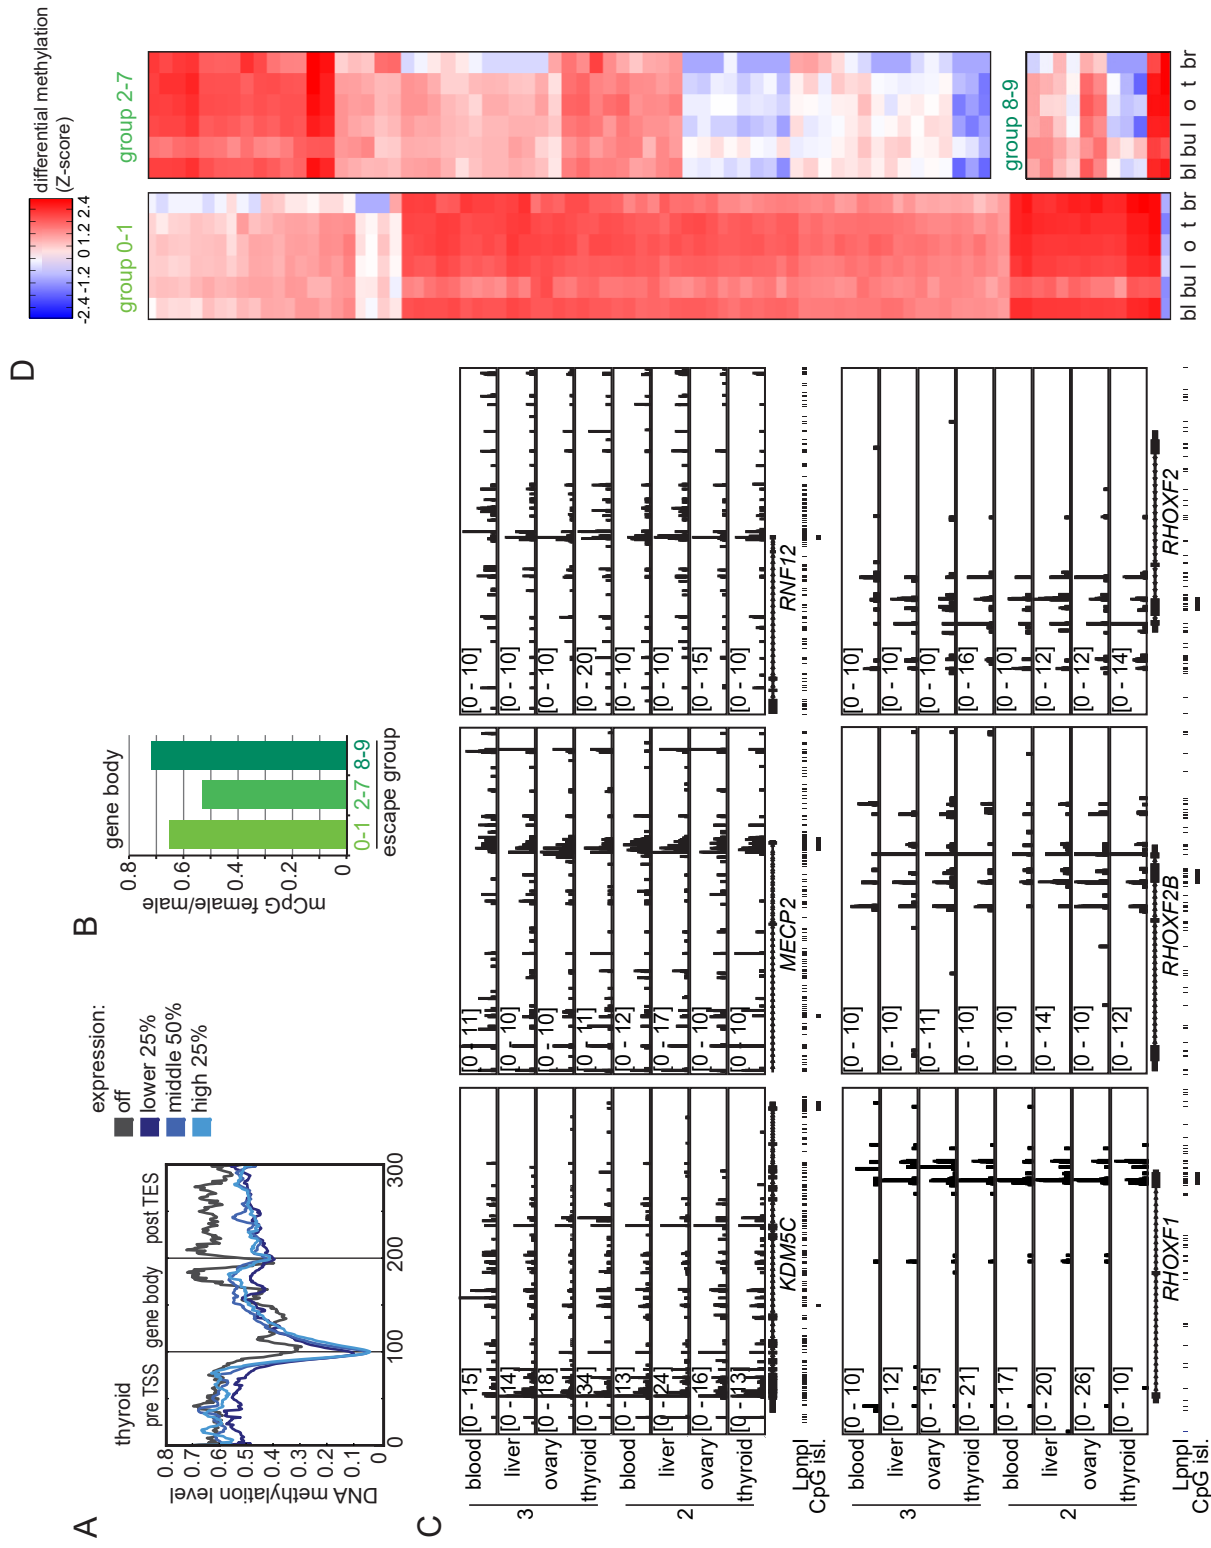

Supplemental Fig S7. DNA methylation in escape of XCI.

- a) DNA methylation profiles for genes of four different expression groups in thyroid. DNA methylation level is shown in 100 bins before the TSS, the gene body, and behind the transcriptional stop.
- b) Shown is the ratio of gene body methylation of X-linked genes, subject to XCI (group 0-1), partially escaping XCI (groups 2-7), and nearly completely escaping XCI (groups 8-9), between female versus male fibroblasts.
- c) MeD-seq tracks showing methylation profiles for *KDM5C* (escaping XCI), *MECP2*, *RNF12/RLIM* (both subject to XCI), and the three *RHOX* genes (*RHOXF1*, *RHOXF2B*, and *RHOXF2*).
- d) Inter organ DMRs were called and displayed according to the escape group. Shown are TSS DMRs that were significant in at least one organ by Bonferroni testing, colored according to the Z-score.
