# Supplementary material for: Genome-wide DNA methylation profiling using the methylation-dependent restriction enzyme LpnPI
Source: PubMed Central journal article supplement — Genome Res. 2018 Jan;28(1):88–99. doi: 10.1101/gr.222885.117 (PMC5749185; doi:10.1101/gr.222885.117), 2018-01
Supplement: supp_gr.222885.117_Supplemental_Table_S1.pdf [file supp_gr.222885.117_Supplemental_Table_S1.pdf]

| patient |            |                    |     |         |           | reads        |          |          |           |          |       |       |
|---------|------------|--------------------|-----|---------|-----------|--------------|----------|----------|-----------|----------|-------|-------|
| nr      | patient ID | enzyme             | age | organ   | fract.    | filter       | accepted | CpG      | %CpG      | map %    |       |       |
| 1       | S13-138    | LpnPI              | 46  | blood   | pippin    | LpnPI        | 20142650 | 8780741  | 43,59     | 96,81    |       |       |
|         |            | LpnPI              |     | buccal  | pippin    | LpnPI        | 15726420 | 5412968  | 34,42     | 98,72    |       |       |
|         |            | LpnPI              |     | ovary   | pippin    | LpnPI        | 19163914 | 11727967 | 61,20     | 98,24    |       |       |
|         |            | LpnPI              |     | thyroid | pippin    | LpnPI        | 19415605 | 7692128  | 39,62     | 97,20    |       |       |
| 2       | S14-073    | LpnPI              | 1   | blood   | pippin    | LpnPI        | 25223315 | 6588192  | 26,12     | 98,50    |       |       |
|         |            | LpnPI              |     | buccal  | pippin    | LpnPI        | 25761563 | 7411724  | 28,77     | 97,05    |       |       |
|         |            | LpnPI              |     | liver   | pippin    | LpnPI        | 14197876 | 7734459  | 54,48     | 98,30    |       |       |
|         |            | LpnPI              |     | ovary   | pippin    | LpnPI        | 15585600 | 10619100 | 68,13     | 98,51    |       |       |
|         |            | LpnPI              |     | thyroid | pippin    | LpnPI        | 16122613 | 8475080  | 52,57     | 97,92    |       |       |
| 3       | S14-074    | LpnPI              | 62  | blood   | pippin    | LpnPI        | 15896973 | 7553548  | 47,52     | 97,78    |       |       |
|         |            | LpnPI              |     | buccal  | pippin    | LpnPI        | 21607283 | 4763773  | 22,05     | 81,30    |       |       |
|         |            | LpnPI              |     | liver   | pippin    | LpnPI        | 18864479 | 12047833 | 63,87     | 97,97    |       |       |
|         |            | LpnPI              |     | ovary   | pippin    | LpnPI        | 18463378 | 10366960 | 56,15     | 97,93    |       |       |
|         |            | LpnPI              |     | thyroid | pippin    | LpnPI        | 18268986 | 10030078 | 54,90     | 96,78    |       |       |
| 4       | S14-129    | LpnPI              | 45  | blood   | pippin    | LpnPI        | 14029777 | 6168039  | 43,96     | 96,75    |       |       |
|         |            | LpnPI              |     | buccal  | pippin    | LpnPI        | 43995435 | 9333542  | 21,21     | 93,88    |       |       |
|         |            | LpnPI              |     | liver   | pippin    | LpnPI        | 15250392 | 8734332  | 57,27     | 98,14    |       |       |
|         |            | LpnPI              |     | ovary   | pippin    | LpnPI        | 20316128 | 12631829 | 62,18     | 96,98    |       |       |
|         |            | LpnPI              |     | thyroid | pippin    | LpnPI        | 18416134 | 8701066  | 47,25     | 96,35    |       |       |
| 5       | S12-233    | LpnPI              | 85  | blood   | gel extr. | LpnPI        | 28430918 | 15978743 | 56,20     | 92,80    |       |       |
|         |            | LpnPI              |     | brain   | gel extr. | LpnPI        | 18375605 | 7699617  | 41,90     | 83,47    |       |       |
|         |            | LpnPI              |     | buccal  | gel extr. | LpnPI        | 18549226 | 7483768  | 40,35     | 87,28    |       |       |
|         |            | LpnPI              |     | liver   | gel extr. | LpnPI        | 19464701 | 9973062  | 51,24     | 95,78    |       |       |
|         |            | LpnPI              |     | ovary   | gel extr. | LpnPI        | 18993061 | 9218160  | 48,53     | 82,20    |       |       |
|         |            | LpnPI              |     | thyroid | gel extr. | LpnPI        | 18459128 | 10852278 | 58,79     | 86,57    |       |       |
| 6       | S13-095    | LpnPI              | 63  | blood   | pippin    | LpnPI        | 15562655 | 7479332  | 48,06     | 98,45    |       |       |
|         |            | LpnPI              |     | brain   | pippin    | LpnPI        | 29064904 | 6785171  | 23,34     | 98,35    |       |       |
|         |            | LpnPI              |     | liver   | pippin    | LpnPI        | 22005876 | 5779689  | 26,26     | 98,01    |       |       |
|         |            | LpnPI              |     | ovary   | pippin    | LpnPI        | 16194589 | 6091197  | 37,61     | 96,94    |       |       |
|         |            | LpnPI              |     | thyroid | pippin    | LpnPI        | 18529276 | 7455484  | 40,24     | 97,11    |       |       |
| 7       | S14-049    | LpnPI              | 67  | blood   | pippin    | LpnPI        | 18471110 | 9144856  | 49,51     | 96,86    |       |       |
|         |            | LpnPI              |     | ovary   | pippin    | LpnPI        | 15724924 | 6402874  | 40,72     | 94,71    |       |       |
|         |            | LpnPI              |     | thyroid | pippin    | LpnPI        | 18388006 | 10060046 | 54,71     | 97,43    |       |       |
| 8       | S14-046    | LpnPI              | 51  | blood   | pippin    | LpnPI        | 18956823 | 5722565  | 30,19     | 97,75    |       |       |
|         |            | LpnPI              |     | buccal  | pippin    | LpnPI        | 23692198 | 6807475  | 28,73     | 98,60    |       |       |
|         |            | LpnPI              |     | ovary   | pippin    | LpnPI        | 16500095 | 5303291  | 32,14     | 98,26    |       |       |
|         |            | LpnPI              |     | thyroid | pippin    | LpnPI        | 17997609 | 8004306  | 44,47     | 96,71    |       |       |
| 9       | S12-198    | LpnPI              | 59  | blood   | pippin    | LpnPI        | 18136992 | 6469823  | 35,67     | 97,36    |       |       |
| 10      | S12-197    | LpnPI              | 44  | blood   | pippin    | LpnPI        | 19214498 | 6546624  | 34,07     | 95,99    |       |       |
|         |            | 86E_1373_wt_repl 1 |     | LpnPI   | -         | female fibro | pippin   | LpnPI    | 29789507  | 19423637 | 65,20 | 98,69 |
|         |            | 86E_1373_wt_repl 1 |     | LpnPI   | -         | female fibro | pippin   | CG       | 29789507  | 20879100 | 70,09 | 98,65 |
|         |            | 86E_1373_wt_repl 2 |     | LpnPI   | -         | female fibro | pippin   | LpnPI    | 33734798  | 21014773 | 62,29 | 98,74 |
|         |            | 86E_1373_wt_repl 2 |     | LpnPI   | -         | female fibro | pippin   | CG       | 33734799  | 22436219 | 66,51 | 98,54 |
|         |            | 86E_1373_wt_repl 1 |     | MspJI   | -         | female fibro | pippin   | LpnPI    | 33481231  | 10886624 | 32,52 | 98,73 |
|         |            | 86E_1373_wt_repl 1 |     | MspJI   | -         | female fibro | pippin   | CG       | 33481231  | 16972458 | 50,69 | 98,68 |
|         |            | 86E_1373_wt_repl 2 |     | MspJI   | -         | female fibro | pippin   | CG       | 34945974  | 11128981 | 31,85 | 98,39 |
|         |            | 86E-1373-wt        |     | FspEI   | -         | female fibro | pippin   | CG       | 20112542  | 15765438 | 78,39 | 98,94 |
|         |            | Fibro-2014-043     |     | LpnPI   | -         | female fibro | pippin   | LpnPI    | 154370180 | 54062366 | 35,02 | 98,72 |
|         |            | iPS-2014-043       |     | LpnPI   | -         | female iPS   | pippin   | LpnPI    | 155322930 | 73910627 | 47,58 | 98,93 |
|         |            | huES8              |     | LpnPI   | -         | female ESC   | pippin   | LpnPI    | 29196273  | 15225244 | 52,14 | 99,15 |
|         |            | repl 1             |     | LpnPI   | -         | 100% me      | pippin   | LpnPI    | 60364128  | 41872870 | 69,37 | 98,45 |
|         |            | repl 2             |     | LpnPI   | -         | 100% me      | pippin   | LpnPI    | 63363554  | 40982514 | 64,68 | 98,46 |

**Supplemental Table S1. Overview of the patient and sequencing data.**

Patient number, ID, read number, size fractionation, filter and mapping statistics are indicated per organ or tissue.
